# Supplementary material for: Aconiti Lateralis Radix Preparata, the Dried Root of Aconitum carmichaelii Debx., Improves Benign Prostatic Hyperplasia via Suppressing 5-Alpha Reductase and Inducing Prostate Cell Apoptosis
Source: Hindawi journal article supplement (doi:10.1155/2019/6369132), 2019-07-31
Supplement: f1 [file 6369132.f1.pdf]

509 **Supplementary Figure S1.**

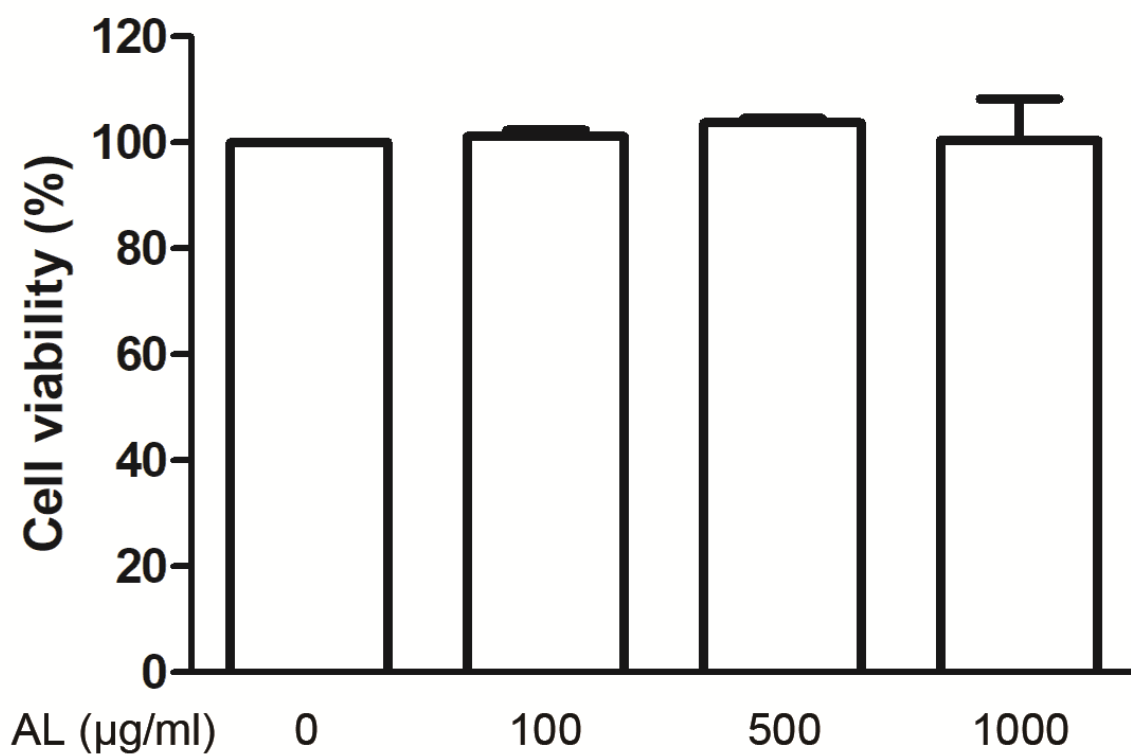

510
